# Supplementary material
Source: PubMed Central journal article supplement (PMC5880708)
Supplement: NIHMS939847-supplement-Supp_AppendixS1.pdf [file NIHMS939847-supplement-Supp_AppendixS1.pdf]

Supporting information for the paper

Ullerud et al. "Consistency in land cover mapping: influence of fieldworkers, spatial scale and classification system." *Applied Vegetation Science*.

**Appendix S1.** Details of the aerial photos. The same photos were used for mapping in both systems.

---

|                            |                                                                     |
|----------------------------|---------------------------------------------------------------------|
| <b>Company</b>             | Blom Geomatics AS                                                   |
| <b>Date of photography</b> | September 28, 2010                                                  |
| <b>Series name</b>         | Sogn 2010                                                           |
| <b>Coverage number</b>     | BNO10044_01_04                                                      |
| <b>Resolution</b>          | 0.5 m                                                               |
| <b>Pictures</b>            | Band 64, pictures 1521–1523 and 1821<br>Band 65, pictures 1390–1392 |

---
