# Supplementary material
Source: PubMed Central journal article supplement (PMC5880708)
Supplement: NIHMS939847-supplement-Supp_AppendixS2.pdf [file NIHMS939847-supplement-Supp_AppendixS2.pdf]

Supporting information for the paper

Ullerud et al. "Consistency in land cover mapping: influence of fieldworkers, spatial scale and classification system." *Applied Vegetation Science*.

**Appendix S2.** Details of the NiN system, and the update from the preliminary system to the revised system.

Nature in Norway (NiN) is a classification system made and owned by the Norwegian Biodiversity Information Centre for the Norwegian Government with the purpose of making one common system that can be used by all sectors involved in management of nature in Norway. Version 1 of the system was published in 2009, and Version 2 was published in 2015. That year the Norwegian Parliament sanctioned a bill which states that the NiN system should be the base for all publicly funded mapping of landscapes, ecosystems and microhabitats in Norway.

The NiN system is rooted in the theory of gradient analysis (e.g. Whittaker, 1967). At the ecosystem level the NiN system has a set of standard principles and criteria that are used to divide naturally continuous nature into 7 major type groups and further into 92 major types. Within each of these major types, gradient analysis is used to identify the most important environmental complex gradients that drive species compositional turnover. These environmental complex gradients are then used to divide the major types into pieces (basic types) that each represents a species turnover of approximately 25 % (Halvorsen et al., 2015). A total of 741 basic types are identified in the NiN system.

For applied mapping with the NiN system, the types are aggregated to five different scale specific mapping units. Currently such units are only published for the terrestrial major type groups at ecosystem level (Bryn & Halvorsen, 2015). There are 443 basic types within the terrestrial major type groups, and for mapping at a scale of 1:500 all basic types are used as mapping units. For mapping at the scale of 1:5,000 the basic types that are ecologically related and typically vary at a small spatial scale are merged to create mapping units.

As the mapping units were published in 2015, they could not be used for fieldwork in 2014, but the major types and the environmental complex gradients were ready for use (Table 1). Therefore, instead of mapping units directly, the delineated polygons were, in a standardized way, assigned positions within pieces of the environmental complex gradients. These positions were subsequently converted into mapping units in 2015 (Table 2). The conversion implied merging of neighboring polygons that were assigned the same mapping unit to a single polygon; otherwise, no delineations were changed. In this study the major types is termed 'groups' and the mapping units termed 'units'. Only terrestrial nature, not permanently covered in snow and ice, was studied, thus 59 groups and 277 units were included.

The mappers made the following preliminary mapping guidelines before fieldwork:

### General rules

Minimum size 100 m<sup>2</sup>

Minimum polygon width 5 m

### How to handle variation nature variations smaller than the minimum size—two solutions:

- 1 Combined element polygons (Used to make note of nature types with a cover smaller than minimum size and larger than 10 m<sup>2</sup>)
- 2 Mosaic (Used when two or three nature types repeatedly occur together in patches smaller than the minimum area)

### Coverage of trees

Mapped for all polygons

Woody plants higher than 2 m are defined as trees. Any area with tree cover greater than 10% is considered forest. A change in tree cover does not mean there should be a new polygon.

**Table 1.** The preliminary system from 2014 with groups and environmental complex gradients.

| Group code and name  | Environmental complex gradients (name and abbreviation) used for each group and the number of positions along them |    |   |
|----------------------|--------------------------------------------------------------------------------------------------------------------|----|---|
| T1 Bare rock         | Lime richness                                                                                                      | KA | 5 |
|                      | Exposure for drought                                                                                               | UE | 4 |
| T3 Mountain heaths   | Lime richness                                                                                                      | KA | 4 |
|                      | Risk of severe drought                                                                                             | UF | 3 |
| T4 Forest            | Lime richness                                                                                                      | KA | 4 |
|                      | Risk of severe drought                                                                                             | UF | 4 |
|                      | Spring water influence                                                                                             | KI | 2 |
| T7 Snow beds         | Lime richness                                                                                                      | KA | 5 |
|                      | Duration of snow cover                                                                                             | SV | 4 |
| T14 Ridges           | Vulnerability to wind                                                                                              | VI | 2 |
|                      | Lime richness                                                                                                      | KA | 2 |
| T13 Scree            | Lime richness                                                                                                      | KA | 3 |
|                      | Vulnerability to landslides                                                                                        | S1 | 3 |
|                      | Exposure for drought                                                                                               | UE | 2 |
| T18 Open flood plain | Dominating grainsize                                                                                               | S1 | 3 |
|                      | Lime richness                                                                                                      | KA | 2 |
| T27 Boulder areas    | Duration of snow cover                                                                                             | SV | 3 |
|                      | Lime richness                                                                                                      | KA | 2 |
| V1 Mire              | Lime richness                                                                                                      | KA | 5 |
|                      | Mire gradient                                                                                                      | MF | 2 |
| V2 Wetland forest    | Lime richness                                                                                                      | KA | 3 |
| V3 Ombrotrophic mire | Mire gradient                                                                                                      | MF | 2 |
| V4 Spring water      | Lime richness                                                                                                      | KA | 3 |
|                      | Spring water influence                                                                                             | KI | 2 |

**Table 2.** The translation of group and positions along gradients to NiN units.

| Group | Registered positions along environmental complex gradients |     |     | NiN unit code | NiN unit name                                      |
|-------|------------------------------------------------------------|-----|-----|---------------|----------------------------------------------------|
| T1    | KA1                                                        | UE3 |     | T1-C2         | Drought-prone lime-poor rock                       |
|       | KA1                                                        | UE4 |     |               |                                                    |
| T3    | KA1                                                        | UF1 |     | T3-C1         | Lime-poor lee side                                 |
|       | KA1                                                        | UF2 |     | T3-C2         | Lime-poor mountain heathlands                      |
|       | KA1                                                        | UF3 |     | T3-C3         | Lime-poor mountain lichen heathlands               |
|       | KA2                                                        | UF1 |     | T3-C4         | Intermediate lee side                              |
|       | KA2                                                        | UF2 |     | T3-C5         | Intermediate mountain heathlands                   |
| T4    | KA1                                                        | UF1 | KI1 | T4-C1         | Bilberry forest                                    |
|       | KA2                                                        | UF1 | KI1 | T4-C2         | Sparse low-herb forest                             |
|       | KA1                                                        | UF2 | KI1 | T4-C5         | Heather-bilberry forest                            |
|       | KA2                                                        | UF2 | KI1 | T4-C6         | Sparse low-herb heather-bilberry forest            |
|       | KA1                                                        | UF3 | KI1 | T4-C9         | Heather forest                                     |
|       | KA2                                                        | UF1 | KI2 | T4-C17        | Fern forest                                        |
|       | KA3                                                        | UF1 | KI2 | T4-C18        | Tall-herb forest                                   |
| T7    | KA1                                                        | SV1 |     | T7-C1         | Very lime-poor moderate snowbed                    |
| T13   | KA1                                                        | S1  | UV2 | T13-C2        | Lime-poor scree                                    |
| T14   | VI1                                                        | KA1 |     | T14-C1        | Lime-poor and intermediate ridge                   |
| T18   | S1 1                                                       | KA2 |     | T18-C3        | Open flood plain on lime-rich coarse sand and rock |
| T27   | SV1                                                        | KA1 |     | T27-C1        | Lime-poor and intermediate boulder areas           |
| V1    | KA1                                                        | MF2 |     | V1-C1         | Very lime-poor mire                                |
|       | KA2                                                        | MF2 |     | V1-C2         | Fairly lime-poor mire                              |
|       | KA1                                                        | MF1 |     | V1-C5         | Very lime-poor mire edge                           |
|       | KA2                                                        | MF1 |     | V1-C6         | Lime-poor mire edge                                |
|       | KA3                                                        | MF1 |     | V1-C7         | Intermediate mire edge                             |
| V2    | KA1                                                        |     |     | V2-C1         | Lime-poor wetland forest                           |
|       | KA2                                                        |     |     | V2-C2         | Intermediate wetland forest                        |
|       | KA3                                                        |     |     | V2-C3         | Lime-rich wetland forest                           |
| V3    | MF2                                                        |     |     | V3-C1         | Ombrotrophic mire                                  |
|       | MF1                                                        |     |     | V3-C2         | Ombrotrophic mire edge                             |
| V4    | KA1                                                        | KI1 |     | V4-C1         | Fairly lime-poor and intermediate spring water     |

## References

Bryn, A., & Halvorsen, R. (2015). *Veileder for kartlegging av terrestrisk naturvariasjon etter NiN (2.0.2)*. Retrieved from Artsdatabanken, Trondheim, Norway.

- Halvorsen, R., Bryn, A., & Erikstad, L. (2015). *NiNs systemkjerne - teori, prinsipper og inndelingskriterier - Natur i Norge, Artikkel 1 (versjon 2.0.3)*. Retrieved from Artsdatabanken, Trondheim, Norway.
- Whittaker, R. H. (1967). Gradient analysis of vegetation. *Biological Reviews of the Cambridge Philosophical Society*, 42, 207-264.
