# Supplementary material
Source: PubMed Central journal article supplement (PMC5880708)
Supplement: NIHMS939847-supplement-Supp_AppendixS3.pdf [file NIHMS939847-supplement-Supp_AppendixS3.pdf]

Supporting information for the paper

Ullerud et al. "Consistency in land cover mapping: influence of fieldworkers, spatial scale and classification system." *Applied Vegetation Science*.

**Appendix S3.** Method for and results of the confusion matrix analysis.

Table 1 Confusion matrix for a pair of hypothetical maps A and B including three units: x, y and z (following Cherrill & McClean 1999). Diagonal elements of the matrix, shown in brackets, represent consistent classifications (not used in further calculations), and non-diagonal elements represent inconsistent classifications (confusion).

|       |        | Map A                            |                                  |                                  |
|-------|--------|----------------------------------|----------------------------------|----------------------------------|
|       |        | Unit x                           | Unit y                           | Unit z                           |
| Map B | Unit x | (A <sub>x</sub> B <sub>x</sub> ) | A <sub>y</sub> B <sub>x</sub>    | A <sub>z</sub> B <sub>x</sub>    |
|       | Unit y | A <sub>x</sub> B <sub>y</sub>    | (A <sub>y</sub> B <sub>y</sub> ) | A <sub>z</sub> B <sub>y</sub>    |
|       | Unit z | A <sub>x</sub> B <sub>z</sub>    | A <sub>y</sub> B <sub>z</sub>    | (A <sub>z</sub> B <sub>z</sub> ) |

Table 2 Units in each system used for analysis of consistency in classification (confusion matrix).

| Ecosystem      | The most common NIBIO units                                                              | The most common NiN units                                                                                        |
|----------------|------------------------------------------------------------------------------------------|------------------------------------------------------------------------------------------------------------------|
| Forest         | 4b Bilberry birch forest<br>7b Bilberry spruce forest<br>7c Meadow spruce forest         | T4-C1 Bilberry forest<br>T4-C2 Sparse low-herb forest<br>T4-C5 Heather-bilberry forest                           |
| Mountain heath | 2c Lichen heath without lichens<br>2cx Lichen heath with lichens<br>2e Dwarf shrub heath | T3-C2 Lime-poor mountain heathlands<br>T3-C3 Lime-poor mountain lichen heathlands<br>T3-C4 Intermediate lee side |
| Wetlands       | 9a Bog<br>9c Fen<br>9d Mud-bottom fen and bog                                            | V1-C1 Very lime-poor mire<br>V1-C5 Very lime-poor mire edge<br>V1-C6 Lime-poor mire edge                         |

Table 3 Confusion matrix for the most frequent NIBIO units in the mapped area. The confusion is rated on a scale from 0 to 12, where 12 is the maximum level of confusion for each pair of units. Where the classification confusion changes after extracting a buffer around all delineations, the new confusion score is given in brackets. Vegetation groups are shown in greyscale, and confusion across groups is indicated by hatching.

|                |     | Mountain heath |       |       | Forest |    |    | Wetland |    |    |
|----------------|-----|----------------|-------|-------|--------|----|----|---------|----|----|
|                |     | 2c             | 2cx   | 2e    | 4b     | 7b | 7c | 9a      | 9c | 9d |
| Mountain heath | 2c  | -              | -     | -     | -      | -  | -  | -       | -  | -  |
|                | 2cx | 5 (4)          | -     | -     | -      | -  | -  | -       | -  | -  |
|                | 2e  | 1              | 8 (7) | -     | -      | -  | -  | -       | -  | -  |
| Forest         | 4b  | 0              | 0     | 0     | -      | -  | -  | -       | -  | -  |
|                | 7b  | 0              | 0     | 0     | 4 (2)  | -  | -  | -       | -  | -  |
|                | 7c  | 0              | 0     | 0     | 0      | 7  | -  | -       | -  | -  |
| Wetland        | 9a  | 0              | 0     | 4 (3) | 0      | 3  | 0  | -       | -  | -  |
|                | 9c  | 0              | 0     | 5 (2) | 1 (0)  | 0  | 0  | 6       | -  | -  |
|                | 9d  | 0              | 0     | 3 (1) | 1 (0)  | 0  | 0  | 8 (5)   | 3  | -  |

Table 4 Confusion matrix for the most frequent NiN units in the mapped area. The confusion is rated on a scale from 0 to 12, where 12 is the maximum level of confusion for each pair of units. Where the classification confusion changes after extracting a buffer around all delineations, the new confusion score is given in brackets. Nature groups are shown in greyscale, and confusion across groups is indicated by hatching.

|                |       | Mountain heath |       |       | Forest |       |       | Wetland |       |       |
|----------------|-------|----------------|-------|-------|--------|-------|-------|---------|-------|-------|
|                |       | T3-C2          | T3-C3 | T3-C4 | T4-C1  | T4-C2 | T4-C5 | V1-C1   | V1-C5 | V1-C6 |
| Mountain heath | T3-C2 | -              | -     | -     | -      | -     | -     | -       | -     | -     |
|                | T3-C3 | 11 (4)         | -     | -     | -      | -     | -     | -       | -     | -     |
|                | T3-C4 | 5              | 0     | -     | -      | -     | -     | -       | -     | -     |
| Forest         | T4-C1 | 0              | 0     | 0     | -      | -     | -     | -       | -     | -     |
|                | T4-C2 | 1 (0)          | 0     | 2     | 6      | -     | -     | -       | -     | -     |
|                | T4-C5 | 3 (2)          | 0     | 0     | 2      | 5 (4) | -     | -       | -     | -     |
| Wetland        | V1-C1 | 1              | 0     | 1 (0) | 0      | 2     | 0     | -       | -     | -     |
|                | V1-C5 | 3 (1)          | 0     | 0     | 0      | 0     | 0     | 4 (3)   | -     | -     |
|                | V1-C6 | 1              | 0     | 2 (0) | 0      | 0     | 0     | 1       | 5     | -     |

## References

Cherrill, A., & McClean, C. (1999). The reliability of 'Phase 1' habitat mapping in the UK: the extent and types of observer bias. *Landscape and Urban Planning*, 45(2-3), 131-143.
