# Supplementary material
Source: PubMed Central journal article supplement (PMC5880708)
Supplement: NIHMS939847-supplement-Supp_AppendixS4.pdf [file NIHMS939847-supplement-Supp_AppendixS4.pdf]

Supporting information for the paper

Ullerud et al. "Consistency in land cover mapping: influence of fieldworkers, spatial scale and classification system." *Applied Vegetation Science*.

**Appendix S4.** NIBIO and NiN maps.

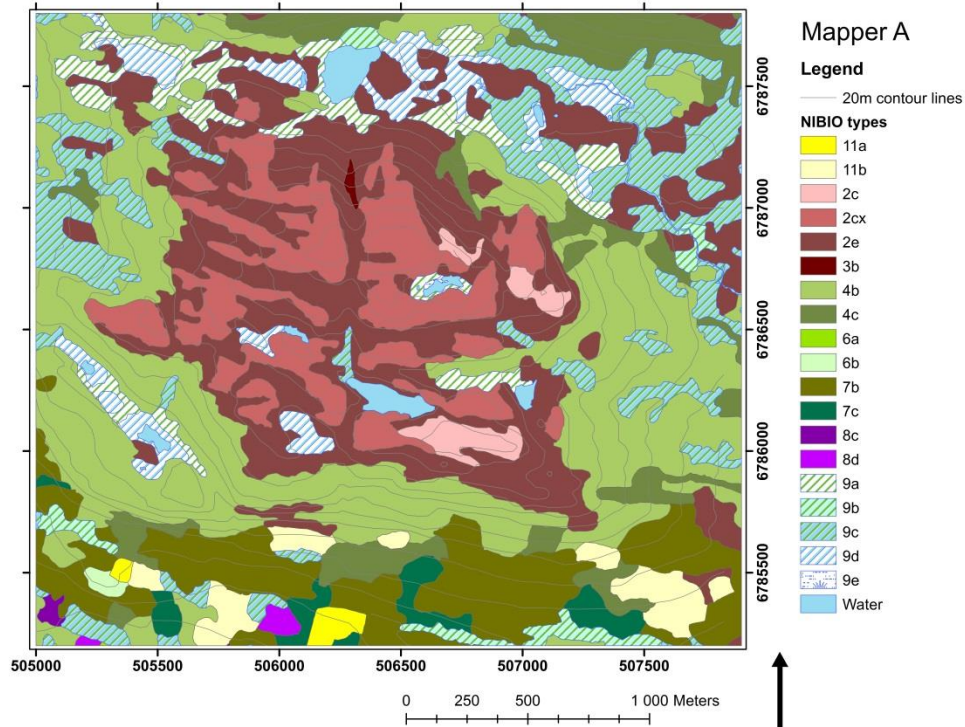

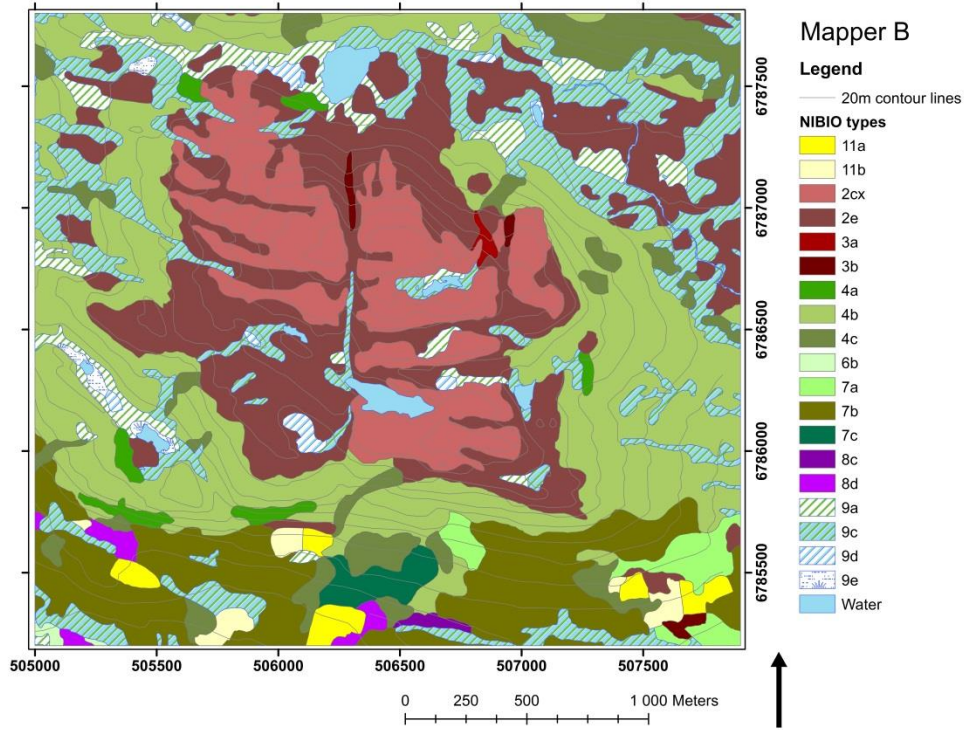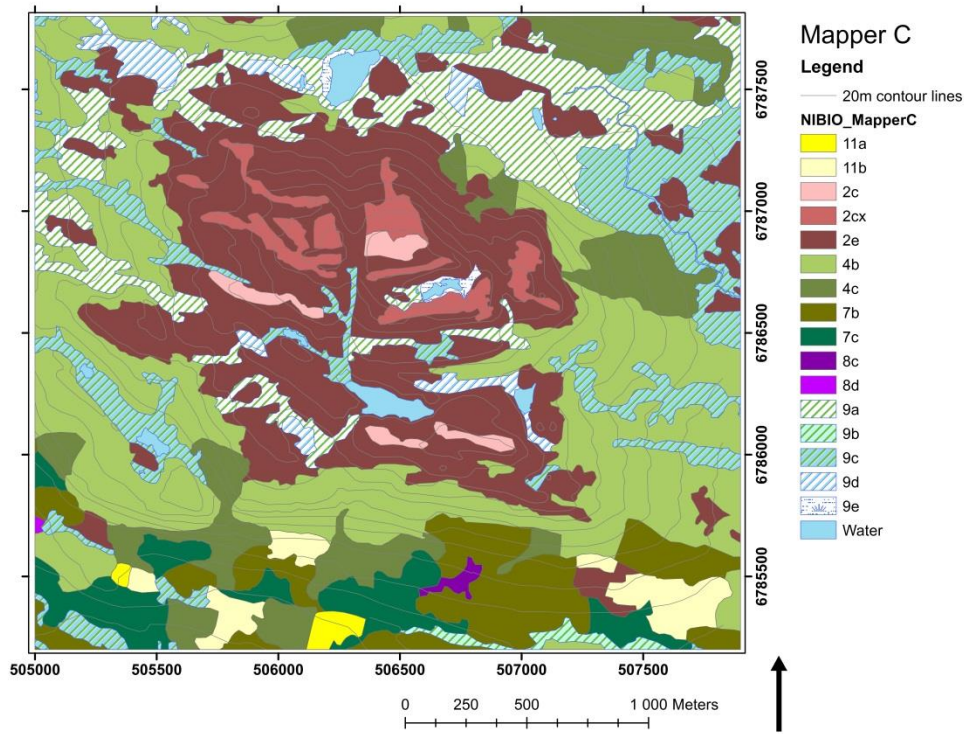

## Registered NIBIO units

| Unit code             | Unit name                            |
|-----------------------|--------------------------------------|
| <b>Mountain heath</b> |                                      |
| 2c                    | Lichen heath                         |
| 2cx                   | Lichen heath, more than 50 % lichens |
| 2e                    | Dwarf shrub heath                    |
| 3a                    | Low herb meadow                      |
| 3b                    | Tall herb meadow                     |
| <b>Forest</b>         |                                      |
| 4a                    | Lichen and heather birch forest      |
| 4b                    | Blueberry birch forest               |
| 4c                    | Meadow birch forest                  |
| 6a                    | Lichen and heather birch forest      |
| 6b                    | Blueberry birch forest               |
| 7a                    | Lichen and heather spruce forest     |
| 7b                    | Blueberry spruce forest              |
| 7c                    | Meadow spruce forest                 |
| <b>Wetland</b>        |                                      |
| 8c                    | Poor swamp forest                    |
| 8d                    | Rich swamp forest                    |
| 9a                    | Bog                                  |
| 9b                    | Deer-grass fen                       |
| 9c                    | Fen                                  |
| 9d                    | Mud-bottom fens and bogs             |
| 9e                    | Sedge marsh                          |
| 11a                   | Cultivated land                      |
| 11b                   | Pastures                             |

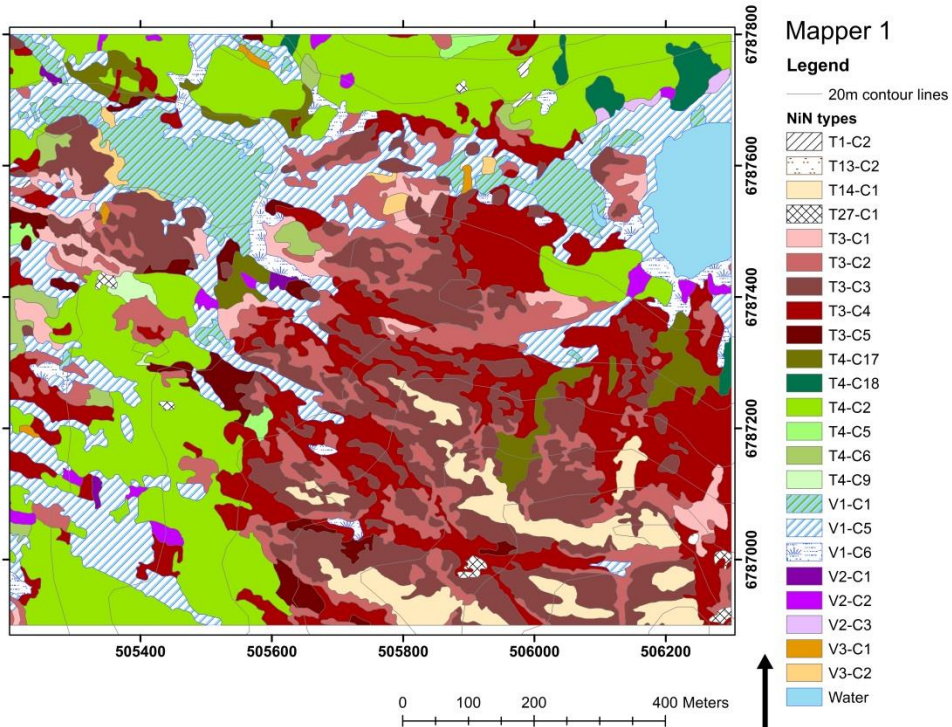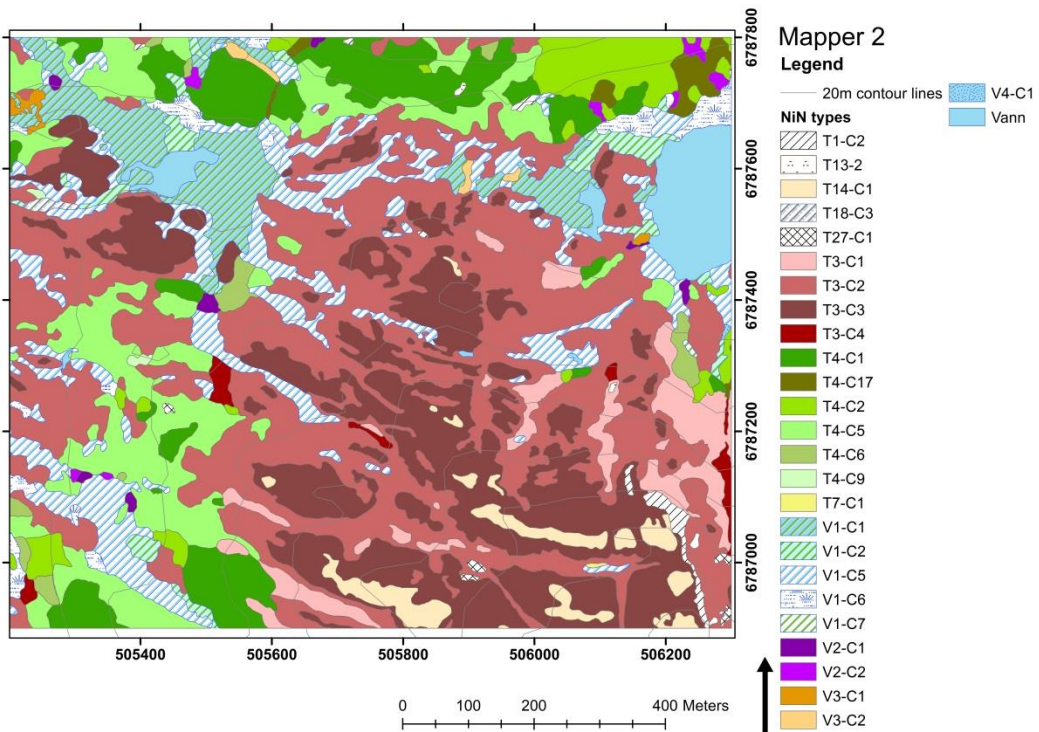

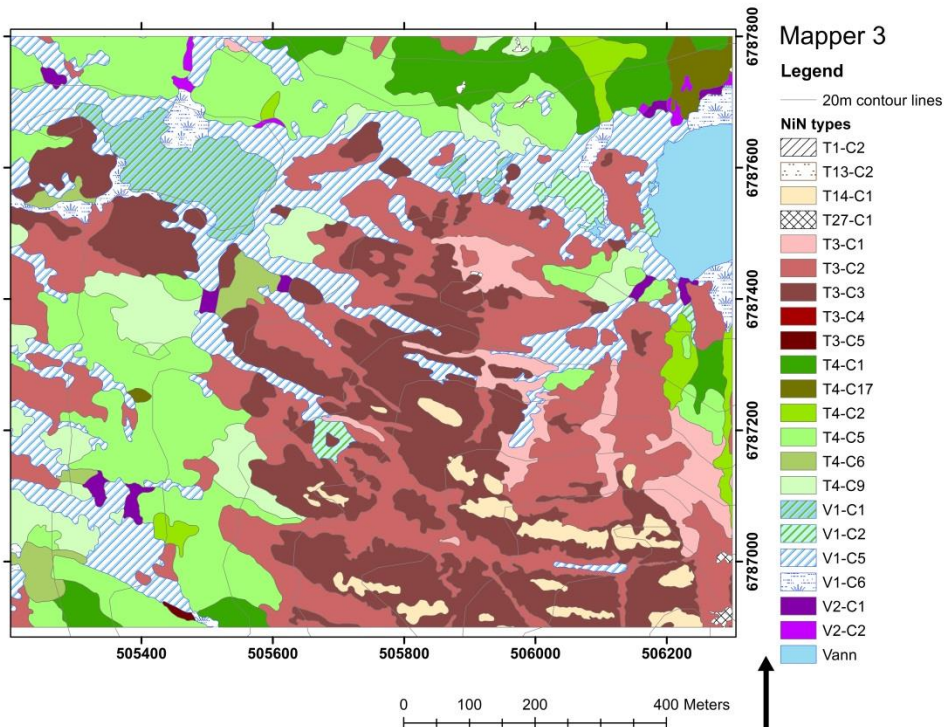

### Registered NiN units

| Unit code             | Unit name                               |
|-----------------------|-----------------------------------------|
| <b>Mountain heath</b> |                                         |
| T3-C1                 | Lime-poor lee side                      |
| T3-C2                 | Lime-poor mountain heathlands           |
| T3-C3                 | Lime-poor mountain lichen heathlands    |
| T3-C4                 | Intermediate lee side                   |
| T3-C5                 | Intermediate mountain heathlands        |
| T7-C1                 | Very lime-poor moderate snowbed         |
| T14-C1                | Lime-poor and intermediate ridge        |
| <b>Forest</b>         |                                         |
| T4-C1                 | Bilberry forest                         |
| T4-C2                 | Sparse low-herb forest                  |
| T4-C5                 | Heather-bilberry forest                 |
| T4-C6                 | Sparse low-herb heather-bilberry forest |
| T4-C9                 | Heather forest                          |
| T4-C17                | Fern forest                             |
| T4-C18                | Tall-herb forest                        |
| <b>Wetland</b>        |                                         |
| V1-C1                 | Very lime-poor mire                     |
| V1-C2                 | Fairly lime-poor mire                   |
| V1-C5                 | Very lime-poor mire edge                |

|               |                                                    |
|---------------|----------------------------------------------------|
| V1-C6         | Lime-poor mire edge                                |
| V1-C7         | Intermediate mire edge                             |
| V2-C1         | Lime-poor wetland forest                           |
| V2-C2         | Intermediate wetland forest                        |
| V2-C3         | Lime-rich wetland forest                           |
| V3-C1         | Ombrotrophic mire                                  |
| V3-C2         | Ombrotrophic mire edge                             |
| V4-C1         | Fairly lime-poor and intermediate spring water     |
| <b>Others</b> |                                                    |
| T1-C2         | Drought-prone lime-poor rock                       |
| T13-C2        | Lime-poor scree                                    |
| T18-C3        | Open flood plain on lime-rich coarse sand and rock |
| T27-C1        | Lime-poor and intermediate boulder areas           |
