# Supplementary material
Source: PubMed Central journal article supplement (PMC5880708)
Supplement: NIHMS939847-supplement-Supp_AppendixS5.pdf [file NIHMS939847-supplement-Supp_AppendixS5.pdf]

Supporting information for the paper

Ullerud et al. "Consistency in land cover mapping: influence of fieldworkers, spatial scale and classification system." *Applied Vegetation Science*.

**Appendix S5.** NIBIO units coverage. Area mapped for each unit by each mapper, and the percentage spatial correspondence between pairs of maps. Unit average gives the percentage of the average area covered by each unit that is mapped consistently. The units are arranged by ecosystem and groups.

| Unit                        | Map A (%) | Map B (%) | Map C (%) | Maps A and B (%) | Maps A and C (%) | Maps B and C (%) | Unit average |
|-----------------------------|-----------|-----------|-----------|------------------|------------------|------------------|--------------|
| <b>Mountain heath</b>       |           |           |           |                  |                  |                  |              |
| 2 Mountain ridge and heaths |           |           |           |                  |                  |                  |              |
| 2c                          | 1.2       | 0.0       | 0.9       | 0.0              | 0.2              | 0.0              | 9.8          |
| 2cx                         | 9.8       | 11.4      | 2.6       | 6.9              | 2.2              | 2.6              | 49.3         |
| 2e                          | 22.7      | 22.2      | 26.4      | 16.0             | 16.6             | 15.7             | 67.9         |
| 3 Mountain meadows          |           |           |           |                  |                  |                  |              |
| 3a                          | 0.0       | 0.1       | 0.0       | 0.0              | 0.0              | 0.0              | 0.0          |
| 3b                          | 0.1       | 0.3       | 0.0       | 0.1              | 0.0              | 0.0              | 17.8         |
| <b>Forest</b>               |           |           |           |                  |                  |                  |              |
| 4 Deciduous forest          |           |           |           |                  |                  |                  |              |
| 4a                          | 0.0       | 1.0       | 0.0       | 0.0              | 0.0              | 0.0              | 0.0          |
| 4b                          | 26.0      | 26.1      | 25.3      | 20.8             | 20.1             | 19.9             | 78.6         |
| 4c                          | 6.8       | 5.8       | 8.7       | 3.3              | 4.0              | 3.7              | 51.4         |
| 6 Pine forest               |           |           |           |                  |                  |                  |              |
| 6a                          | 0.0       | 0.0       | 0.0       | 0.0              | 0.0              | 0.0              | 0.0          |
| 6b                          | 0.2       | 0.1       | 0.0       | 0.0              | 0.0              | 0.0              | 0.0          |
| 7 Spruce forest             |           |           |           |                  |                  |                  |              |
| 7a                          | 0.0       | 1.5       | 0.0       | 0.0              | 0.0              | 0.0              | 0.0          |
| 7b                          | 9.0       | 9.7       | 6.2       | 6.3              | 4.9              | 4.2              | 62.0         |
| 7c                          | 1.7       | 0.9       | 4.1       | 0.3              | 1.1              | 0.8              | 31.9         |
| <b>Wetland</b>              |           |           |           |                  |                  |                  |              |
| 8 Bog and swamp forest      |           |           |           |                  |                  |                  |              |
| 8c                          | 0.1       | 0.2       | 0.2       | 0.0              | 0.0              | 0.0              | 0.0          |
| 8d                          | 0.2       | 0.5       | 0.0       | 0.0              | 0.0              | 0.0              | 5.7          |
| 9 Wetlands                  |           |           |           |                  |                  |                  |              |
| 9a                          | 3.9       | 3.5       | 9.9       | 1.6              | 1.7              | 1.4              | 27.5         |
| 9b                          | 1.3       | 0.0       | 0.5       | 0.0              | 0.5              | 0.0              | 25.9         |
| 9c                          | 9.4       | 12.3      | 9.9       | 6.0              | 4.4              | 5.2              | 49.4         |
| 9d                          | 3.4       | 0.6       | 1.7       | 0.5              | 1.0              | 0.4              | 33.3         |
| 9e                          | 0.0       | 0.3       | 0.2       | 0.0              | 0.0              | 0.0              | 3.6          |
| <b>Others</b>               |           |           |           |                  |                  |                  |              |
| 11a                         | 0.5       | 1.1       | 0.4       | 0.4              | 0.4              | 0.4              | 64.1         |

|                                 |           |           |           |             |             |             |           |
|---------------------------------|-----------|-----------|-----------|-------------|-------------|-------------|-----------|
| 11b                             | 2.3       | 0.8       | 2.2       | 0.7         | 1.8         | 0.7         | 61.8      |
| Water                           | 1.3       | 1.3       | 1.2       | 1.3         | 1.2         | 1.2         | 97.5      |
| <b>Total</b>                    |           |           |           | <b>64.4</b> | <b>60.2</b> | <b>56.3</b> |           |
| <b>Number of units included</b> | <b>20</b> | <b>20</b> | <b>17</b> | <b>17</b>   | <b>17</b>   | <b>15</b>   | <b>17</b> |
