# Supplementary material
Source: PubMed Central journal article supplement (PMC5880708)
Supplement: NIHMS939847-supplement-Supp_AppendixS6.pdf [file NIHMS939847-supplement-Supp_AppendixS6.pdf]

Supporting information for the paper

Ullerud et al. "Consistency in land cover mapping: influence of fieldworkers, spatial scale and classification system." *Applied Vegetation Science*.

**Appendix S6.** NiN units coverage. Area mapped for each NiN2.0 unit by each mapper, and the percentage spatial correspondence between pairs of maps. Unit average gives the percentage of the average area covered by each unit that is mapped consistently. The units are arranged by ecosystem and groups.

| Unit                  | Map 1 (%) | Map 2 (%) | Map 3 (%) | Maps 1 and 2 (%) | Maps 1 and 3 (%) | Maps 2 and 3 (%) | Unit average |
|-----------------------|-----------|-----------|-----------|------------------|------------------|------------------|--------------|
| <b>Mountain heath</b> |           |           |           |                  |                  |                  |              |
| Mountain heaths       |           |           |           |                  |                  |                  |              |
| T3-C1                 | 2.6       | 3.7       | 3.7       | 0.2              | 0.2              | 1.2              | 16.0         |
| T3-C2                 | 10.1      | 31.9      | 22.0      | 7.6              | 5.9              | 16.9             | 47.4         |
| T3-C3                 | 15.9      | 18.0      | 19.1      | 13.2             | 12.6             | 14.5             | 76.0         |
| T3-C4                 | 16.8      | 0.6       | 0.0       | 0.3              | 0.0              | 0.0              | 1.9          |
| T3-C5                 | 1.8       | 0.0       | 0.1       | 0.0              | 0.0              | 0.0              | 0.0          |
| T7 Snow beds          |           |           |           |                  |                  |                  |              |
| T7-C1                 | 0.0       | 0.0       | 0.0       | 0.0              | 0.0              | 0.0              | 0.0          |
| T14 Ridges            |           |           |           |                  |                  |                  |              |
| T14-C1                | 4.0       | 2.0       | 2.2       | 1.8              | 2.1              | 1.3              | 63.7         |
| <b>Forest</b>         |           |           |           |                  |                  |                  |              |
| T4 Forest             |           |           |           |                  |                  |                  |              |
| T4-C1                 | 0.0       | 7.2       | 4.7       | 0.0              | 0.0              | 2.3              | 19.5         |
| T4-C2                 | 20.0      | 3.1       | 1.7       | 2.3              | 0.7              | 0.7              | 10.0         |
| T4-C5                 | 0.4       | 10.0      | 15.6      | 0.1              | 0.0              | 7.5              | 0.0          |
| T4-C6                 | 1.1       | 0.9       | 1.3       | 0.0              | 0.0              | 0.4              | 14.7         |
| T4-C9                 | 0.2       | 0.1       | 5.0       | 0.0              | 0.2              | 0.0              | 29.2         |
| T4-C17                | 2.5       | 0.8       | 0.8       | 0.0              | 0.0              | 0.4              | 13.0         |
| T4-C18                | 1.0       | 0.0       | 0.0       | 0.0              | 0.0              | 0.0              | 4.0          |
| <b>Wetland</b>        |           |           |           |                  |                  |                  |              |
| V1 Mire               |           |           |           |                  |                  |                  |              |
| V1-C1                 | 4.8       | 4.9       | 3.0       | 3.4              | 2.8              | 2.4              | 68.0         |
| V1-C2                 | 0.0       | 1.5       | 0.9       | 0.0              | 0.0              | 0.1              | 2.8          |
| V1-C5                 | 12.2      | 9.0       | 14.5      | 5.9              | 8.6              | 6.9              | 60.1         |
| V1-C6                 | 1.9       | 1.4       | 1.8       | 0.1              | 0.2              | 0.5              | 16.5         |
| V1-C7                 | 0.0       | 0.0       | 0.0       | 0.0              | 0.0              | 0.0              | 0.0          |
| V2 Wetland forest     |           |           |           |                  |                  |                  |              |
| V2-C1                 | 0.2       | 0.3       | 0.7       | 0.0              | 0.1              | 0.2              | 28.1         |
| V2-C2                 | 0.8       | 0.3       | 0.3       | 0.0              | 0.0              | 0.0              | 2.5          |
| V2-C3                 | 0.2       | 0.0       | 0.0       | 0.0              | 0.0              | 0.0              | 0.0          |

|                                 |           |           |           |             |             |             |           |
|---------------------------------|-----------|-----------|-----------|-------------|-------------|-------------|-----------|
| V3 Ombrotrophic mire            |           |           |           |             |             |             |           |
| V3-C1                           | 0.2       | 0.2       | 0.0       | 0.0         | 0.0         | 0.0         | 0.0       |
| V3-C2                           | 0.4       | 0.2       | 0.0       | 0.0         | 0.0         | 0.0         | 0.0       |
| V4 Spring water                 |           |           |           |             |             |             |           |
| V4-C1                           | 0.0       | 0.0       | 0.0       | 0.0         | 0.0         | 0.0         | 0.0       |
| <b>Others</b>                   |           |           |           |             |             |             |           |
| T1-C2                           | 0.1       | 0.4       | 0.0       | 0.0         | 0.0         | 0.0         | 12.7      |
| T13-C2                          | 0.0       | 0.1       | 0.0       | 0.0         | 0.0         | 0.0         | 0.0       |
| T18-C3                          | 0.0       | 0.1       | 0.0       | 0.0         | 0.0         | 0.0         | 0.0       |
| T27-C1                          | 0.3       | 0.1       | 0.1       | 0.1         | 0.1         | 0.1         | 49.5      |
| Water                           | 2.5       | 3.2       | 2.5       | 2.5         | 2.4         | 2.4         | 89.9      |
| <b>Total</b>                    |           |           |           | <b>37.7</b> | <b>35.9</b> | <b>57.8</b> |           |
| <b>Number of units included</b> | <b>24</b> | <b>27</b> | <b>22</b> | <b>21</b>   | <b>20</b>   | <b>21</b>   | <b>20</b> |
