# Supplementary material
Source: PubMed Central journal article supplement (PMC5880708)

Supporting information for the paper

Ullerud et al. "Consistency in land cover mapping: influence of fieldworkers, spatial scale and classification system." *Applied Vegetation Science*.

**Appendix S7.** One polygon from each of the three NiN maps covering the same forest. The units are 'sparse low-herb forest' (T4-C2), 'bilberry forest' (T4-C1) and 'heather-bilberry forest' (T4-C5), thus different in all three maps. It is not known whether this is due to mappers having different perceptions of the units or due to differences in the positions of boundaries giving different content of the polygons. Coordinates are given in WGS 84/UTM 32N.

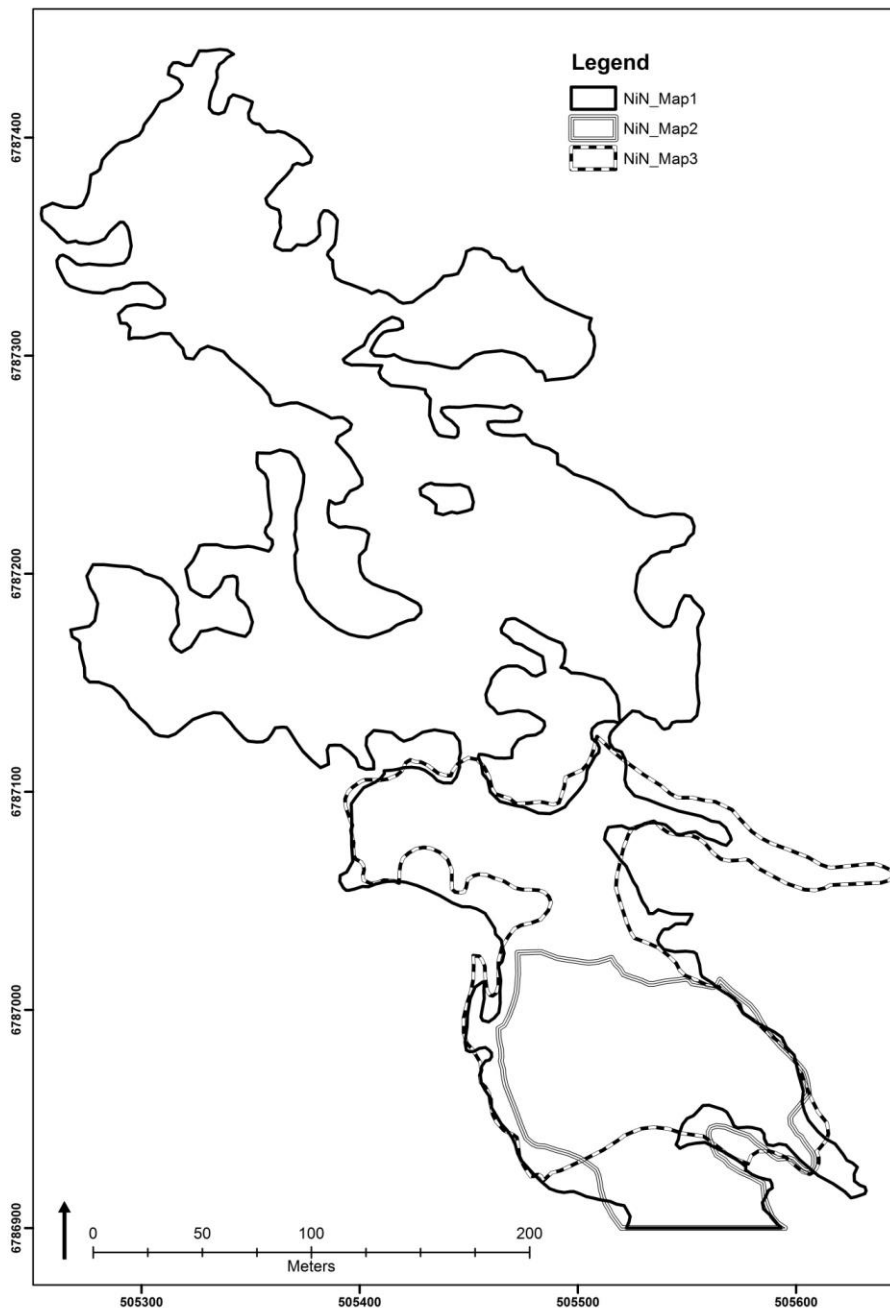

Supplement: NIHMS939847-supplement-Supp_AppendixS7.pdf [file NIHMS939847-supplement-Supp_AppendixS7.pdf]
